# Supplementary material for: Dynamic changes in the human methylome during differentiation
Source: HighWire-hosted journal article supplement (doi:10.1101/gr.101907.109), 2010-02-04
Supplement: Supplementary_Table_1.pdf [file Supplementary_Table_1.pdf]

Supplementary Table 1. Sequencing and mapping summary

| Cell line                            | hESC                  |            | Fibro                        |            | hESC-Fibro                                     |            |
|--------------------------------------|-----------------------|------------|------------------------------|------------|------------------------------------------------|------------|
| Description                          | undifferentiated hESC |            | neonatal foreskin fibroblast |            | hESC differentiated into fibroblast-like cells |            |
| # of runs                            | 6                     |            | 5                            |            | 6                                              |            |
| run type                             | 2x 51, 2x76 mix       |            | 2x 51, 2x76, 2x99 mix        |            | 2x 51, 2x76 mix                                |            |
|                                      | reads                 | bases (Gb) | reads                        | bases (Gb) | reads                                          | bases (Gb) |
| Pass filtered                        | 858,141,016           | 63.2       | 958,424,656                  | 69.8       | 816,830,044                                    | 63.4       |
| Mapped                               | 523,457,901           | 34.1       | 595,846,336                  | 37.3       | 507,178,044                                    | 35.4       |
| Mapping rate                         | 61.0%                 |            | 62.2%                        |            | 62.1%                                          |            |
| Uniquely mapped                      | 407,608,000           | 26         | 460,830,001                  | 28         | 337,179,056                                    | 22.9       |
| Redundancy                           | 28.4%                 |            | 29.3%                        |            | 50.4%                                          |            |
| Effective coverage                   | <b>9.1X</b>           |            | <b>9.8X</b>                  |            | <b>8.0X</b>                                    |            |
| Conversion rate                      | 98.5%                 |            | 99.3%                        |            | 99.2%                                          |            |
| # of C covered per strand            |                       |            |                              |            |                                                |            |
| ( covered by at least 1 read)        | 516,837,311           |            | 524,002,293                  |            | 486,542,051                                    |            |
| % of C covered                       | 88.5%                 |            | 89.8%                        |            | 83.4%                                          |            |
| # of C within CpG covered per strand |                       |            |                              |            |                                                |            |
| (covered by at least 1 read)         | 26,179,206            |            | 26,361,395                   |            | 25,394,948                                     |            |
| % of C within CpG covered            | 94.0%                 |            | 94.6%                        |            | 91.2%                                          |            |
| CpG methylation rate                 | 57.4%                 |            | 52.5%                        |            | 58.5%                                          |            |
