# Supplementary material for: Dynamic changes in the human methylome during differentiation
Source: HighWire-hosted journal article supplement (doi:10.1101/gr.101907.109), 2010-02-04
Supplement: Supplementary_Table_2.pdf [file Supplementary_Table_2.pdf]

## hESC

|                 |                          | Bisulfite-Seq data |         |         |         |           |                              |
|-----------------|--------------------------|--------------------|---------|---------|---------|-----------|------------------------------|
|                 |                          |                    |         |         |         |           | not covered by Bisulfite-Seq |
|                 |                          | M                  | M_P     | P       | U_P     | U         |                              |
| Methyl 27K data | M                        | 3248               | 961     | 461     | 111     | 305       | 1598                         |
|                 | M_P                      | 429                | 210     | 203     | 96      | 136       | 350                          |
|                 | P                        | 129                | 104     | 196     | 192     | 292       | 230                          |
|                 | U_P                      | 74                 | 39      | 166     | 270     | 687       | 248                          |
|                 | U                        | 51                 | 14      | 85      | 230     | 14184     | 2019                         |
|                 | not covered by Methyl27K | 13464760           | 2730393 | 2749820 | 2783742 | 258417844 |                              |

Total #CpGs on Methyl27K Array 27318  
 #CpG on Methyl27K Array also covered by Bisulfite-Seq 22873  
 %CpGs on Methyl27K Array also covered by Bisulfite-Seq 83.73%

Total #Cs covered by Bisulfite-Seq 280169432  
 #Cs covered by Bisulfite-Seq also covered by Methyl27K Array 22873

%Cs covered by Bisulfite-Seq also covered by Methyl27K Array 0.01%

#CpGs covered by both the Methyl27K array and Bisulfite-Seq 22873  
 #CpGs assigned to the same category 18108  
 %covered CpGs assigned to the same category 79.17%

## hESC-Fibro

|                 |                          | Bisulfite-Seq data |         |         |         |           |                              |
|-----------------|--------------------------|--------------------|---------|---------|---------|-----------|------------------------------|
|                 |                          |                    |         |         |         |           | not covered by Bisulfite-Seq |
|                 |                          | M                  | M_P     | P       | U_P     | U         |                              |
| Methyl 27K data | M                        | 2335               | 215     | 116     | 32      | 109       | 1154                         |
|                 | M_P                      | 692                | 173     | 108     | 29      | 88        | 431                          |
|                 | P                        | 530                | 182     | 150     | 85      | 138       | 453                          |
|                 | U_P                      | 369                | 157     | 185     | 161     | 354       | 468                          |
|                 | U                        | 544                | 243     | 454     | 764     | 13648     | 2951                         |
|                 | not covered by Methyl27K | 12207941           | 1680959 | 1665408 | 1240620 | 234514114 |                              |

Total #CpGs on Methyl27K Array 27318  
 #CpG on Methyl27K Array also covered by Bisulfite-Seq 21861  
 %CpGs on Methyl27K Array also covered by Bisulfite-Seq 80.02%

Total #Cs covered by Bisulfite-Seq 251330903  
 #Cs covered by Bisulfite-Seq also covered by Methyl27K Array 21861

%Cs covered by Bisulfite-Seq also covered by Methyl27K Array 0.01%

#CpGs covered by both the Methyl27K array and Bisulfite-Seq 21861  
 #CpGs assigned to the same category 16467  
 %covered CpGs assigned to the same category 75.33%

## Fibro

|                 |                          | Bisulfite-Seq data |         |         |         |           |                              |
|-----------------|--------------------------|--------------------|---------|---------|---------|-----------|------------------------------|
|                 |                          |                    |         |         |         |           | not covered by Bisulfite-Seq |
|                 |                          | M                  | M_P     | P       | U_P     | U         |                              |
| Methyl 27K data | M                        | 2423               | 567     | 439     | 253     | 665       | 1833                         |
|                 | M_P                      | 294                | 135     | 146     | 125     | 303       | 488                          |
|                 | P                        | 163                | 68      | 123     | 181     | 751       | 501                          |
|                 | U_P                      | 62                 | 45      | 94      | 153     | 925       | 454                          |
|                 | U                        | 57                 | 23      | 81      | 220     | 12888     | 2858                         |
|                 | not covered by Methyl27K | 9900354            | 1747503 | 1838423 | 1338152 | 228215795 |                              |

Total #CpGs on Methyl27K Array 27318  
 #CpG on Methyl27K Array also covered by Bisulfite-Seq 21184  
 %CpGs on Methyl27K Array also covered by Bisulfite-Seq 77.55%

Total #Cs covered by Bisulfite-Seq 243061411  
 #Cs covered by Bisulfite-Seq also covered by Methyl27K Array 21184

%Cs covered by Bisulfite-Seq also covered by Methyl27K Array 0.01%

#CpGs covered by both the Methyl27K array and Bisulfite-Seq 21184  
 #CpGs assigned to the same category 15722  
 %covered CpGs assigned to the same category 74.22%

## All

|                 |                          | Bisulfite-Seq data |         |         |         |           |                              |
|-----------------|--------------------------|--------------------|---------|---------|---------|-----------|------------------------------|
|                 |                          |                    |         |         |         |           | not covered by Bisulfite-Seq |
|                 |                          | M                  | M_P     | P       | U_P     | U         |                              |
| Methyl 27K data | M                        | 8006               | 1743    | 1016    | 396     | 1079      | 4585                         |
|                 | M_P                      | 1415               | 518     | 457     | 250     | 527       | 1269                         |
|                 | P                        | 822                | 354     | 469     | 458     | 1181      | 1184                         |
|                 | U_P                      | 505                | 241     | 445     | 584     | 1966      | 1170                         |
|                 | U                        | 652                | 280     | 620     | 1214    | 40720     | 7828                         |
|                 | not covered by Methyl27K | 35573055           | 6158855 | 6253651 | 5362514 | 721147753 |                              |

Total #CpGs on Methyl27K Array 81954  
 #CpG on Methyl27K Array also covered by Bisulfite-Seq 65918  
 %CpGs on Methyl27K Array also covered by Bisulfite-Seq 80.43%

Total #Cs covered by Bisulfite-Seq 774561746  
 #Cs covered by Bisulfite-Seq also covered by Methyl27K Array 65918

%Cs covered by Bisulfite-Seq also covered by Methyl27K Array 0.01%

#CpGs covered by both the Methyl27K array and Bisulfite-Seq 65918  
 #CpGs assigned to the same category 50297  
 %covered CpGs assigned to the same category 76.30%
